# Supplementary material
Source: PubMed Central journal article supplement (PMC3050667)
Supplement: supp_138.7.1409_DEV060046FigS5.pdf [file supp_138.7.1409_DEV060046FigS5.pdf]

**A** control

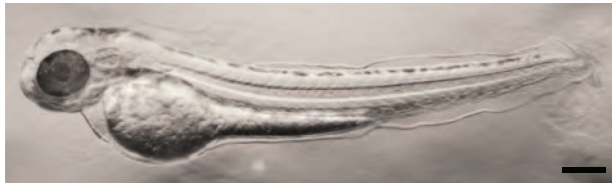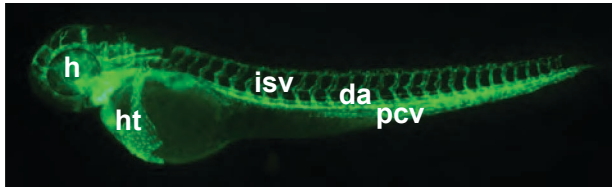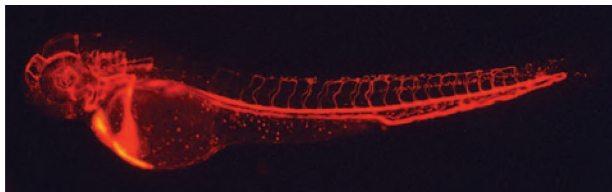

*slit2* MO

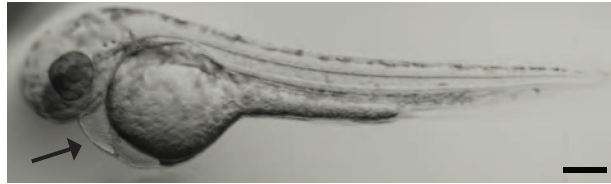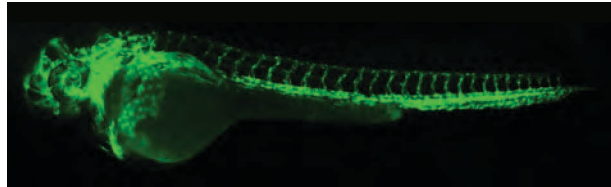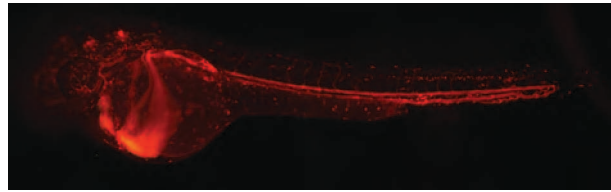

*slit3* MO

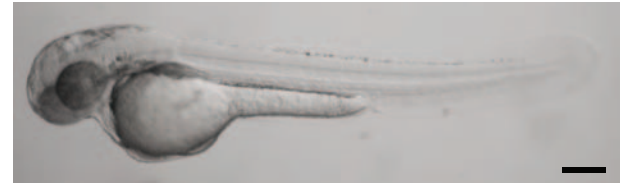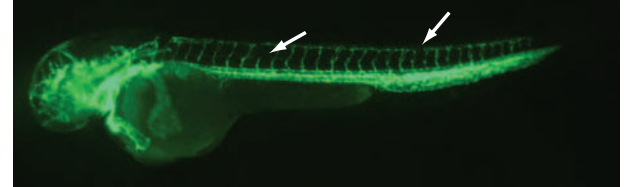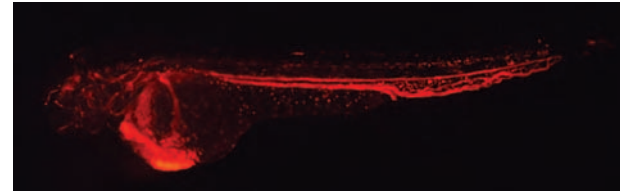

*robo1* MO

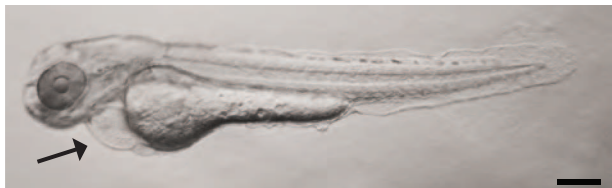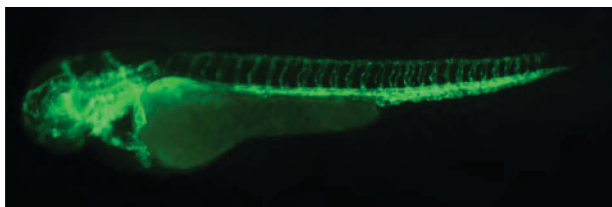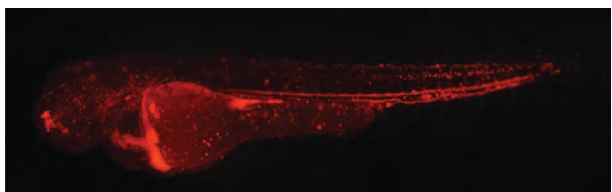

*robo4* MO

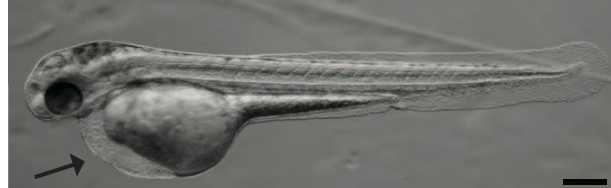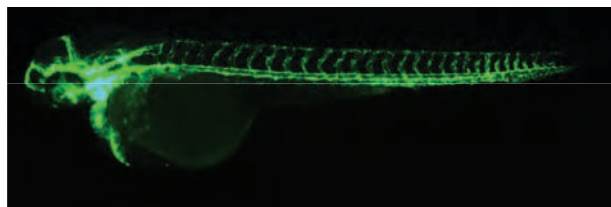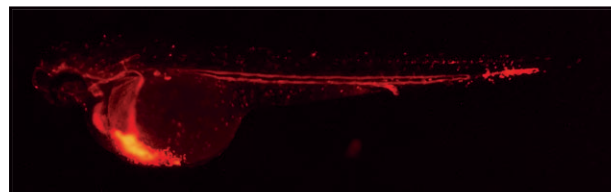

*kdr1:GFP*; *gata1:dsRed*

48 hpf

48 hpf

**B**

wild-type

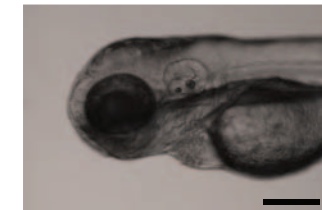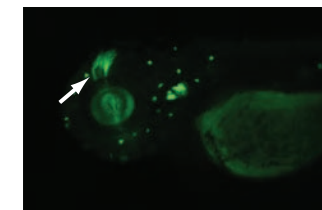

*pou4f3:GFP*

*astray (robo2<sup>-/-</sup>)*

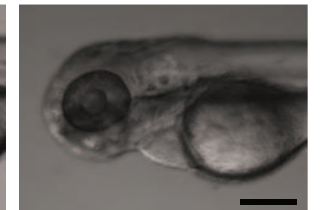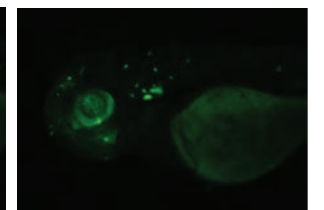

72 hpf
