# Supplementary material
Source: PubMed Central journal article supplement (PMC3050667)

# A

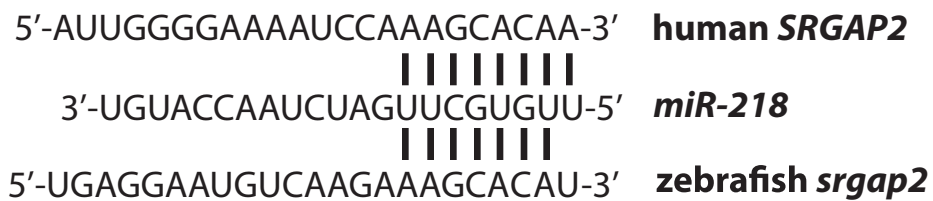

# B

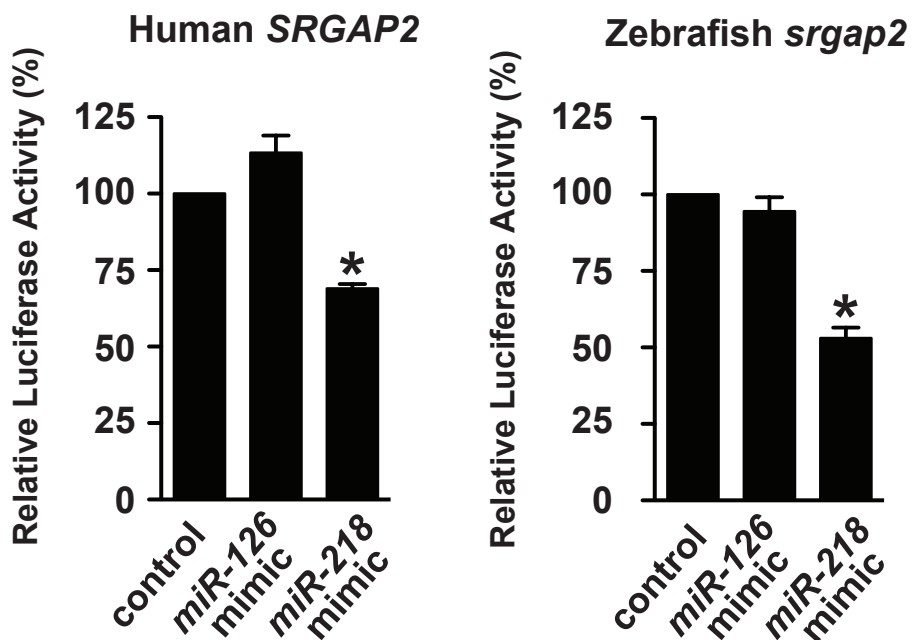

Supplement: supp_138.7.1409_DEV060046FigS1.pdf [file supp_138.7.1409_DEV060046FigS1.pdf]

48 hpf

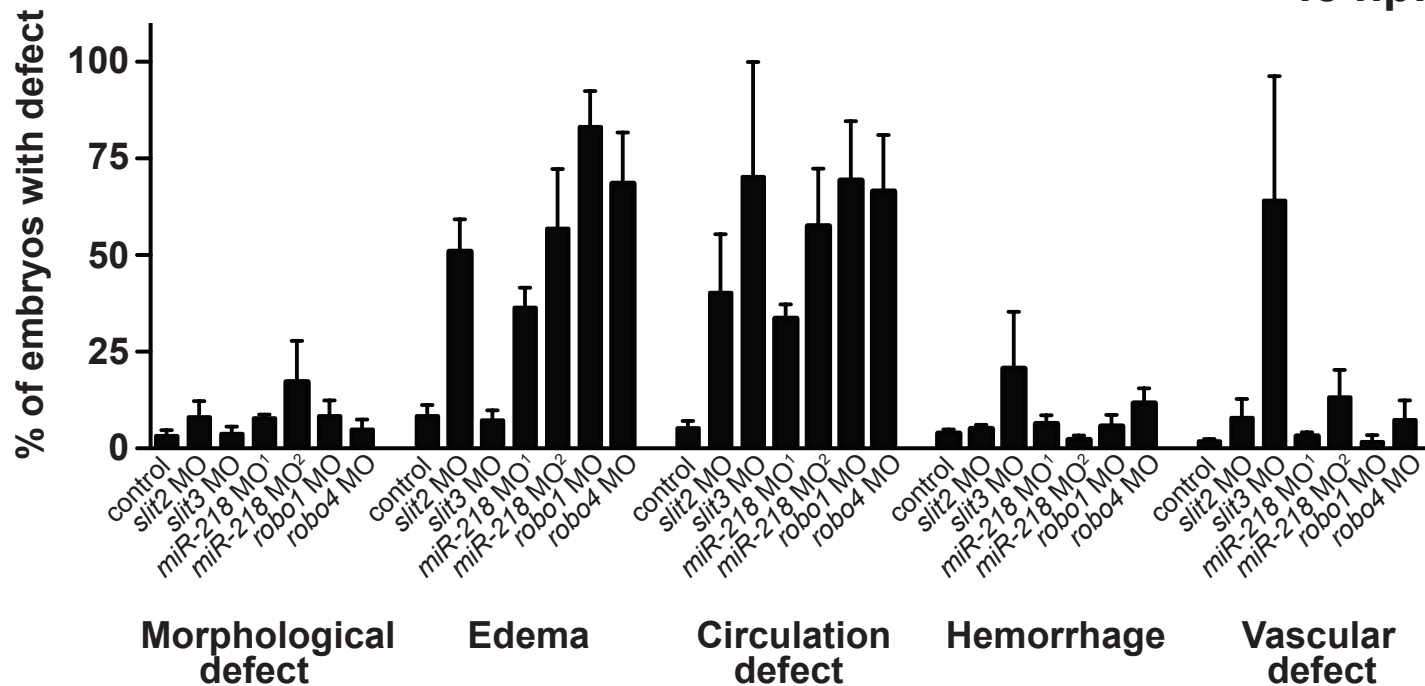

Supplement: supp_138.7.1409_DEV060046FigS3.pdf [file supp_138.7.1409_DEV060046FigS3.pdf]

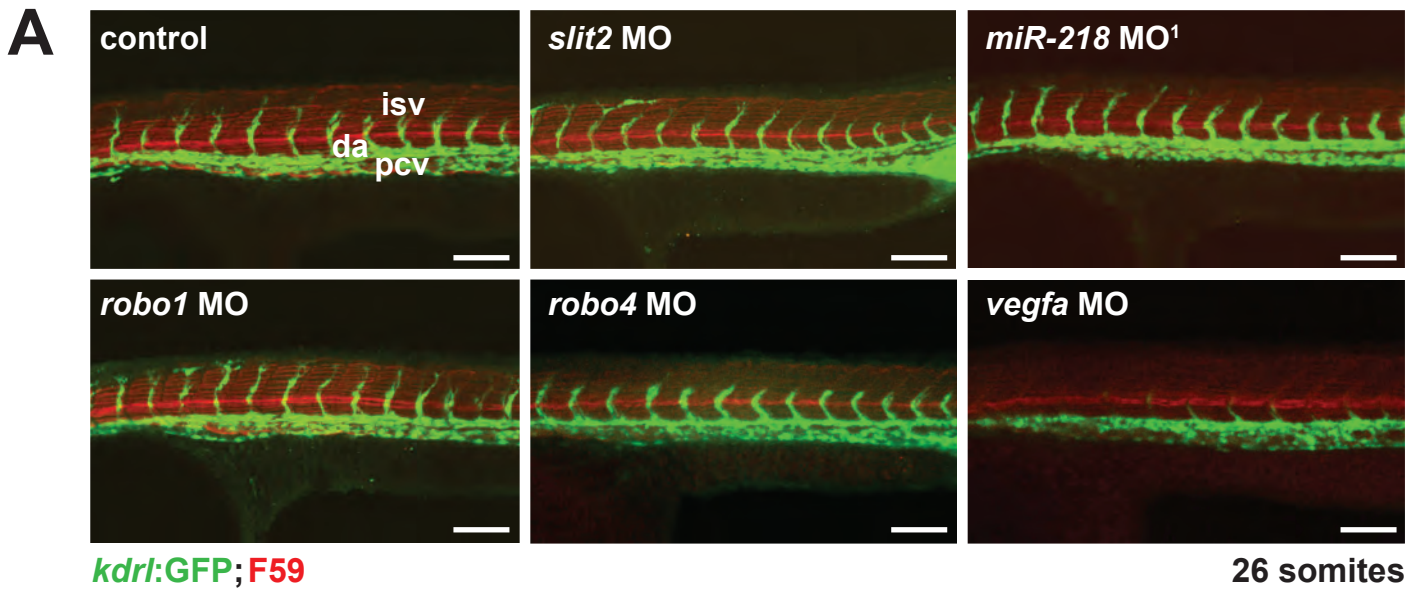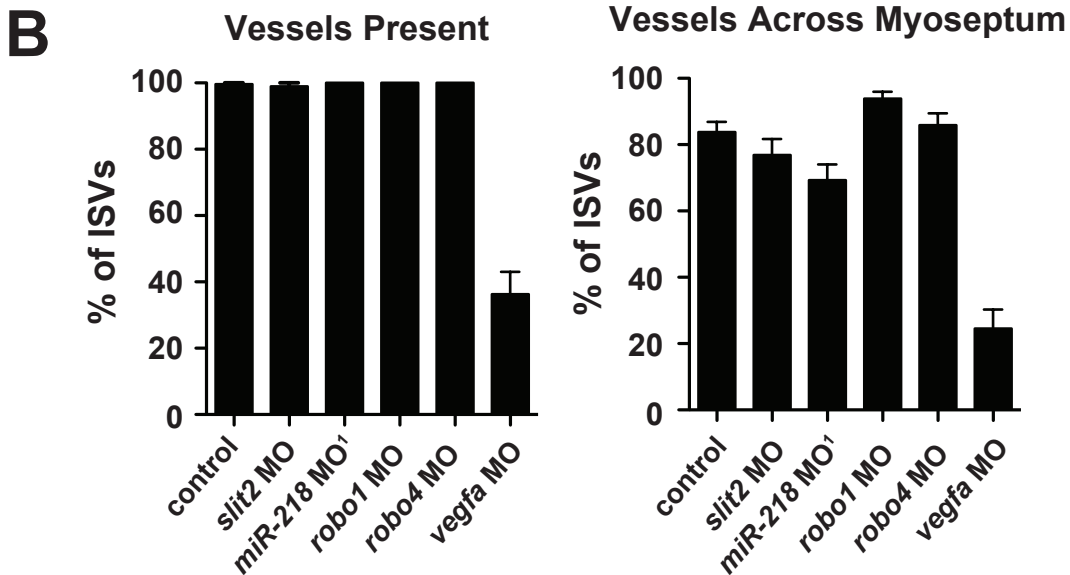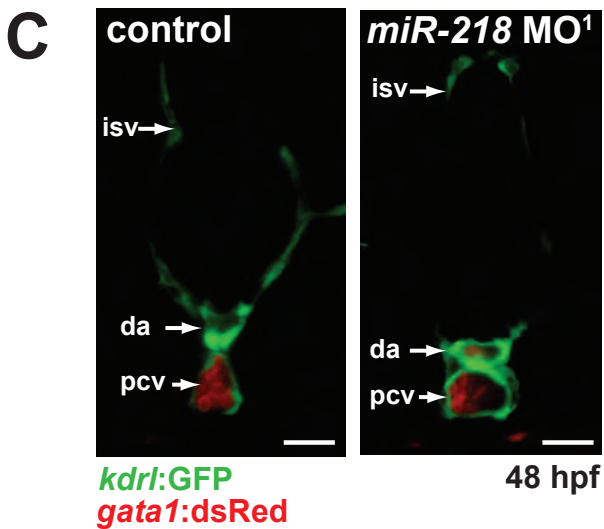

Supplement: supp_138.7.1409_DEV060046FigS4.pdf [file supp_138.7.1409_DEV060046FigS4.pdf]

**A**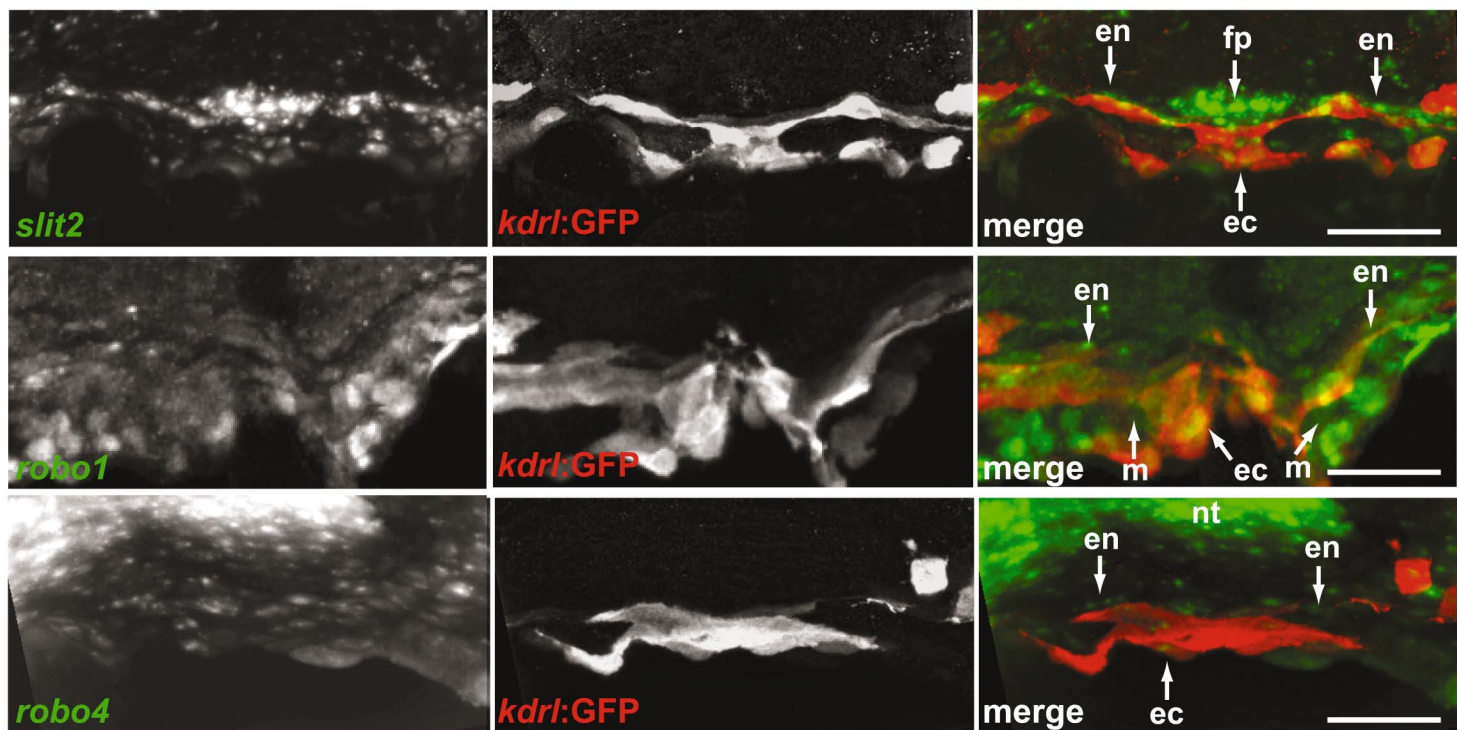

20 somites

**B**

*kdrl:GFP*<sup>+</sup>
 *myl7:GFP*<sup>+</sup>
 *sox17:GFP*<sup>+</sup>

20 somites

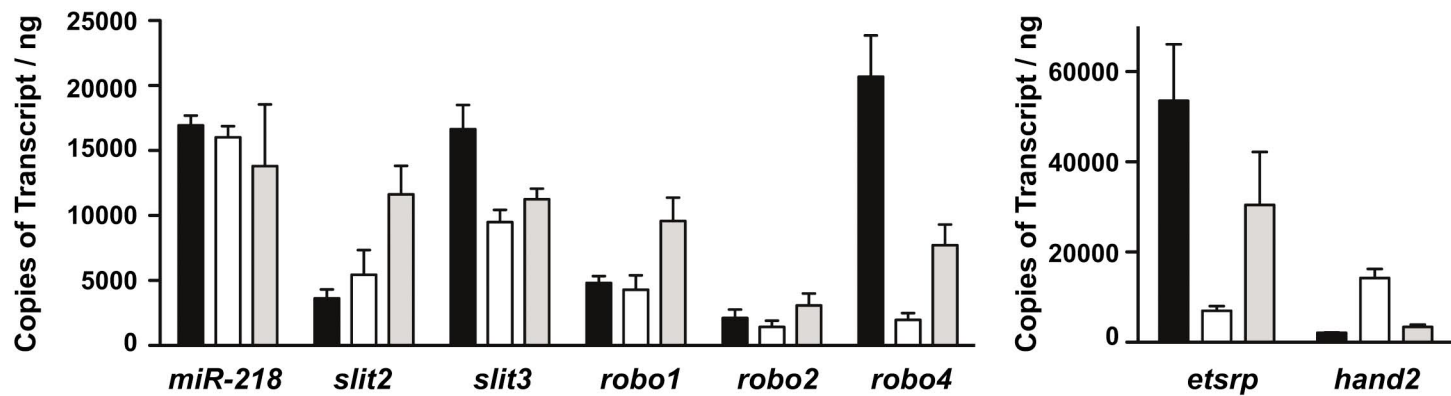

Supplement: supp_138.7.1409_DEV060046FigS6.pdf [file supp_138.7.1409_DEV060046FigS6.pdf]

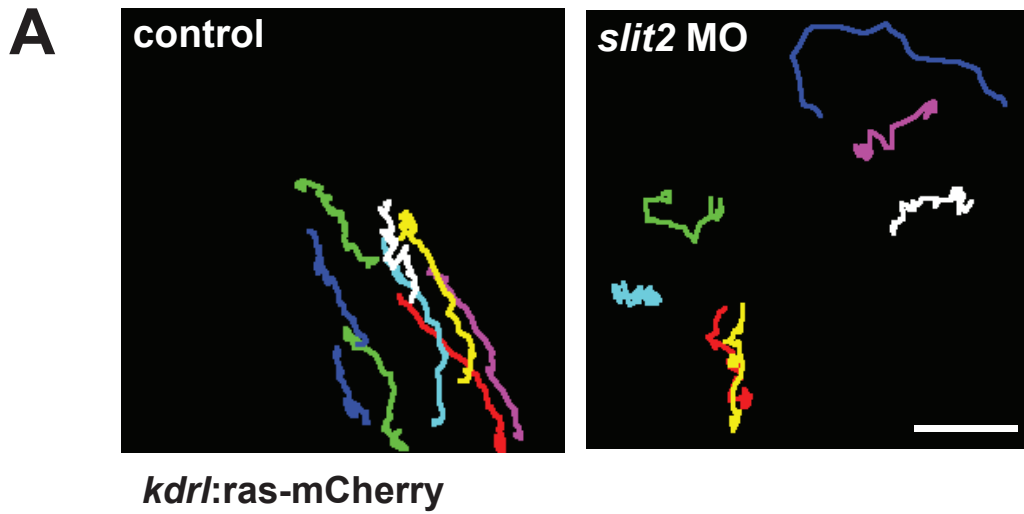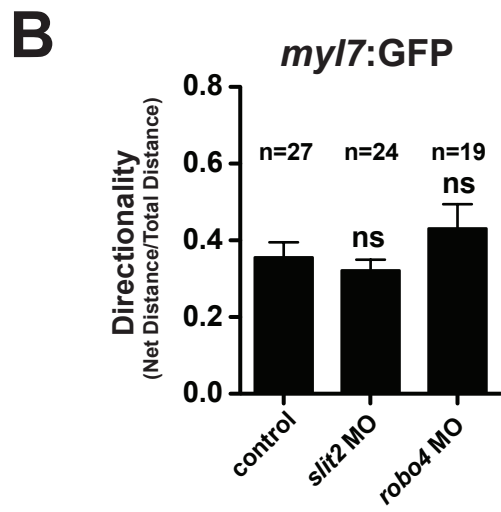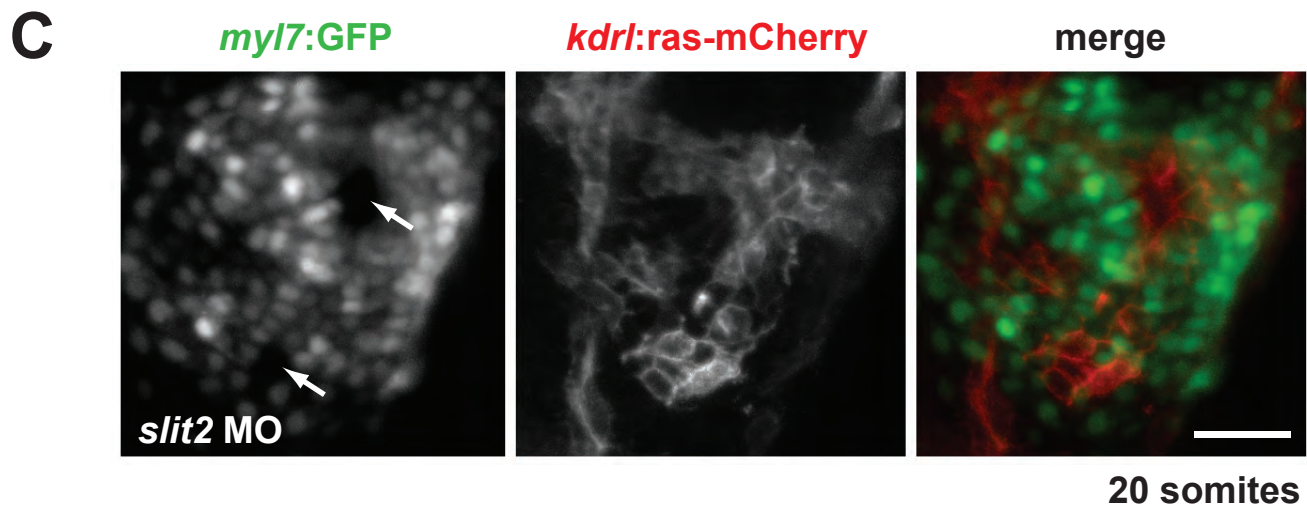

Supplement: supp_138.7.1409_DEV060046FigS7.pdf [file supp_138.7.1409_DEV060046FigS7.pdf]
